# Supplementary material for: What is the optimal level of population alcohol consumption for chronic disease prevention in England? Modelling the impact of changes in average consumption levels
Source: PubMed Central journal article supplement — BMJ Open. 2012 May 30;2(3):e000957. doi: 10.1136/bmjopen-2012-000957 (PMC3367150; doi:10.1136/bmjopen-2012-000957), 2012-05-30
Supplement: bmjopen-2012-000957-s1.pdf [file bmjopen-2012-000957-s1.pdf]

## Supplementary information

Table S1. Relative risks used in modelling [relationships between average alcohol consumption levels and chronic disease mortality in PRIME-Alcohol](#)

| Outcome                                               | Alcohol consumption level (g/day) | Relative Risk for mortality |                     |
|-------------------------------------------------------|-----------------------------------|-----------------------------|---------------------|
| CHD<br>(Ronksley et al., 2011)                        | 0                                 | 1.00                        |                     |
|                                                       | <2.5                              | 0.92 (0.80 to 1.06)         |                     |
|                                                       | 2.5 – 15                          | 0.79 (0.73 to 0.86)         |                     |
|                                                       | 15 – 30                           | 0.79 (0.71 to 0.88)         |                     |
|                                                       | 30 – 60                           | 0.77 (0.72 to 0.83)         |                     |
|                                                       | >60                               | 0.75 (0.63 to 0.89)         |                     |
| Stroke<br>(Ronksley et al., 2011)                     | 0                                 | 1.00                        |                     |
|                                                       | <2.5                              | 1.00 (0.75 to 1.34)         |                     |
|                                                       | 2.5 – 15                          | 0.86 (0.75 to 0.99)         |                     |
|                                                       | 15 – 30                           | 1.15 (0.86 to 1.54)         |                     |
|                                                       | 30 – 60                           | 1.10 (0.85 to 1.45)         |                     |
|                                                       | >60                               | 1.44 (0.99 to 2.10)         |                     |
| Diabetes<br>(Koppes et al., 2005)                     | 0                                 | 1.00                        |                     |
|                                                       | <6                                | 0.88 (0.80 to 0.95)         |                     |
|                                                       | 6-12                              | 0.73 (0.62 to 0.86)         |                     |
|                                                       | 12-24                             | 0.66 (0.59 to 0.75)         |                     |
|                                                       | 24-48                             | 0.74 (0.63 to 0.88)         |                     |
|                                                       | >48                               | 0.93 (0.74 to 1.18)         |                     |
| Hypertensive disease – men<br>(Taylor et al., 2009)   | per 10g                           | 1.09 (1.07 to 1.12)         |                     |
| Hypertensive disease – women<br>(Taylor et al., 2009) | per 10g                           | 1.10 (1.06 to 1.14)         |                     |
| Epilepsy<br>(Samokhvalov et al., 2010)                | 0                                 | 1.00                        |                     |
|                                                       | <12                               | 1.00                        |                     |
|                                                       | 12 – 48                           | 1.17 (1.13 to 1.21)         |                     |
|                                                       | 48 – 72                           | 1.81 (1.59 to 2.07)         |                     |
|                                                       | 72 -96                            | 2.44 (2.00 to 2.97)         |                     |
|                                                       | >96                               | 3.27 (2.52 to 4.26)         |                     |
| Liver cirrhosis – men<br>(Rehm et al., 2010)          | 0                                 | 1.00                        |                     |
|                                                       | <12                               | 1.0 (0.6 to 1.6)            |                     |
|                                                       | 12-24                             | 1.6 (1.4 to 2.0)            |                     |
|                                                       | 24-36                             | 2.8 (2.3 to 3.4)            |                     |
|                                                       | 36-48                             | 5.6 (4.5 to 7.0)            |                     |
|                                                       | 48-60                             | 7.0 (5.8 to 8.5)            |                     |
|                                                       | >60                               | 14 (11.7 to 16.7)           |                     |
| Liver cirrhosis – women<br>(Rehm et al., 2010)        | 0                                 | 1.00                        |                     |
|                                                       | <12                               | 1.9 (1.1 to 3.1)            |                     |
|                                                       | 12-24                             | 5.6 (4.5 to 6.9)            |                     |
|                                                       | 24-36                             | 7.7 (6.3 to 9.5)            |                     |
|                                                       | 36-48                             | 10.1 (7.5 to 13.5)          |                     |
|                                                       | 48-60                             | 14.7 (11.0 to 19.6)         |                     |
|                                                       | >60                               | 22.7 (17.2 to 30.1)         |                     |
| Cancer<br>(WCRF / AICR, 2007)                         |                                   |                             |                     |
|                                                       | Liver                             | Per 10g                     | 1.10 (1.02 to 1.07) |
|                                                       | Mouth, larynx, pharynx            | Per drink per week          | 1.24 (1.18 to 1.30) |
|                                                       | Oesophagus                        | Per drink per week          | 1.04 (1.03 to 1.05) |
|                                                       | Breast                            | 10g                         | 1.10 (1.06 to 1.14) |
|                                                       | Colorectum                        | 10g                         | 1.09 (1.03 to 1.14) |

[chronic disease mortality in PRIME-Alcoholmption levels an cenario, however the standard eviation of d, and this is emphasised](#)

Table S2. Calculating impact on deaths from liver cirrhosis of increasing consumption of alcohol by 8g/d (one unit). Results shown for men aged 75-79 as example

| Alcohol consumption (g/d) | Relative risk <sup>1</sup> | Baseline population <sup>2</sup> | Baseline deaths <sup>3</sup> | Mortality rate per 1,000 <sup>4</sup> | Counterfactual population <sup>5</sup> | Counterfactual deaths <sup>6</sup> |
|---------------------------|----------------------------|----------------------------------|------------------------------|---------------------------------------|----------------------------------------|------------------------------------|
| <=1                       | 1.0                        | 229,532                          | 24                           | 0.11                                  | 229,532                                | 24                                 |
| 1 - <=12                  | 1.0                        | 232,024                          | 24                           | 0.11                                  | 146,491                                | 15                                 |
| 12 - <=24                 | 1.6                        | 126,930                          | 21                           | 0.17                                  | 130,440                                | 22                                 |
| 24 - <=36                 | 2.8                        | 54,831                           | 16                           | 0.29                                  | 73,789                                 | 22                                 |
| 36 - <=48                 | 5.6                        | 27,303                           | 16                           | 0.59                                  | 43,678                                 | 26                                 |
| 48 - <=60                 | 7.0                        | 15,076                           | 11                           | 0.74                                  | 27,400                                 | 20                                 |
| >60                       | 14.0                       | 28,404                           | 42                           | 1.47                                  | 68,950                                 | 101                                |
|                           |                            | <i>TOTAL</i>                     | <i>154</i>                   |                                       | <i>TOTAL</i>                           | <i>230</i>                         |

<sup>1</sup> Taken from meta-analysis of prospective cohort studies (Rehm et al., 2010); <sup>2</sup> The total population of men aged 75-79 in England in 2006, following the distribution of alcohol consumption described by the General Household Survey 2006; <sup>3</sup> The total number of deaths from liver cirrhosis in men aged 75-79 in England in 2006, split so that mortality rates respect the relative risks; <sup>4</sup> Mortality rates, which follow the relative risks shown in the earlier column; <sup>5</sup> The population of men aged 75-79 under the counterfactual scenario, in which all drinkers drink one unit per day more; <sup>6</sup> The counterfactual number of deaths, calculated using the mortality rates and the counterfactual population.

Table S3. Population size and alcohol consumption [characteristics by sex and 5-year age group](#) in England, 2006

| Sex    | Age group, years | Population size <sup>1</sup> | Non-drinkers (<1g/day) <sup>2</sup> | Daily intake (g/day) among drinkers, median <sup>2</sup> |
|--------|------------------|------------------------------|-------------------------------------|----------------------------------------------------------|
| Male   | 15-19            | 1,719,800                    | 30.9%                               | 14.9                                                     |
|        | 20-24            | 1,716,200                    | 15.3%                               | 18.0                                                     |
|        | 25-29            | 1,636,900                    | 16.5%                               | 19.3                                                     |
|        | 30-34            | 1,714,100                    | 16.2%                               | 14.8                                                     |
|        | 35-39            | 1,933,300                    | 16.5%                               | 17.3                                                     |
|        | 40-44            | 1,939,700                    | 16.5%                               | 17.5                                                     |
|        | 45-49            | 1,717,700                    | 15.6%                               | 17.0                                                     |
|        | 50-54            | 1,511,900                    | 18.6%                               | 18.0                                                     |
|        | 55-59            | 1,608,900                    | 17.4%                               | 17.5                                                     |
|        | 60-64            | 1,320,600                    | 18.3%                               | 17.4                                                     |
|        | 65-69            | 1,074,300                    | 20.6%                               | 14.8                                                     |
|        | 70-74            | 906,300                      | 23.4%                               | 13.3                                                     |
|        | 75-79            | 714,100                      | 31.6%                               | 12.5                                                     |
|        | 80-84            | 476,000                      | 32.7%                               | 10.9                                                     |
| 85+    | 323,700          | 43.7%                        | 10.1                                |                                                          |
| Female | 15-19            | 1,614,800                    | 33.4%                               | 10.4                                                     |
|        | 20-24            | 1,654,200                    | 25.6%                               | 10.9                                                     |
|        | 25-29            | 1,633,900                    | 26.4%                               | 9.9                                                      |
|        | 30-34            | 1,719,100                    | 33.3%                               | 10.9                                                     |
|        | 35-39            | 1,946,400                    | 30.1%                               | 10.0                                                     |
|        | 40-44            | 1,971,700                    | 27.2%                               | 9.8                                                      |
|        | 45-49            | 1,740,000                    | 30.5%                               | 11.0                                                     |
|        | 50-54            | 1,546,900                    | 29.4%                               | 11.3                                                     |
|        | 55-59            | 1,652,000                    | 36.3%                               | 10.6                                                     |
|        | 60-64            | 1,376,400                    | 41.7%                               | 9.9                                                      |
|        | 65-69            | 1,155,800                    | 54.5%                               | 9.4                                                      |
|        | 70-74            | 1,034,900                    | 49.7%                               | 8.2                                                      |
|        | 75-79            | 923,800                      | 54.6%                               | 7.8                                                      |
|        | 80-84            | 746,000                      | 61.2%                               | 7.2                                                      |
| 85+    | 731,200          | 68.7%                        | 7.9                                 |                                                          |

<sup>1</sup> Population estimates from Office for National Statistics; <sup>2</sup> Estimates taken from the General Household Survey 2006(Office for National Statistics, 2008) (n = 14,306)

Table S4. Annual chronic disease deaths averted or delayed in counterfactual scenarios in which the percentage of non-drinkers in the population varies from 0% to 100%

|                        | 0%     | 10%    | 20%   | 30%  | 40%    | 50%    | 60%    | 70%    | 80%    | 90%    | 100%    |
|------------------------|--------|--------|-------|------|--------|--------|--------|--------|--------|--------|---------|
| Total                  | 4,160  | 2,727  | 1,259 | -59  | -441   | -844   | -1,269 | -1,714 | -2,178 | -2,660 | -3,160  |
| Males                  | 1,462  | 960    | 444   | -42  | -312   | -602   | -910   | -1,236 | -1,578 | -1,936 | -2,309  |
| Females                | 2,698  | 1,767  | 815   | -18  | -129   | -243   | -359   | -479   | -600   | -725   | -851    |
| Males under 75 years   | -201   | -124   | -54   | 23   | 157    | 276    | 379    | 468    | 544    | 607    | 659     |
| Females under 75 years | -472   | -300   | -134  | 22   | 159    | 293    | 426    | 557    | 685    | 812    | 937     |
| CVD                    | 7,705  | 4,994  | 2,280 | -228 | -1,649 | -3,071 | -4,494 | -5,918 | -7,342 | -8,767 | -10,193 |
| Cancer                 | -2,771 | -1,765 | -792  | 104  | 738    | 1,351  | 1,943  | 2,516  | 3,071  | 3,608  | 4,129   |
| Liver disease          | -1,265 | -819   | -374  | 77   | 558    | 1,039  | 1,521  | 2,002  | 2,483  | 2,964  | 3,445   |

A positive number indicates lives saved compared to 2006 mortality, a negative number denotes a net increase in mortality compared to 2006. Assumes that the distribution of consumption in drinkers remains constant





### References for supplementary information:

- KOPPES, L. L., DEKKER, J. M., HENDRIKS, H. F., BOUTER, L. M. & HEINE, R. J. 2005. Moderate alcohol consumption lowers the risk of type 2 diabetes: a meta-analysis of prospective observational studies. *Diabetes Care*, 28, 719-25.
- OFFICE FOR NATIONAL STATISTICS 2008. Overview report. *General Household Survey, 2006*. United Kingdom.
- REHM, J., TAYLOR, B., MOHAPATRA, S., IRVING, H., BALIUNAS, D., PATRA, J. & ROERECKE, M. 2010. Alcohol as a risk factor for liver cirrhosis: a systematic review and meta-analysis. *Drug Alcohol Rev*, 29, 437-45.
- RONKSLEY, P. E., BRIEN, S. E., TURNER, B. J., MUKAMAL, K. J. & GHALI, W. A. 2011. Association of alcohol consumption with selected cardiovascular disease outcomes: a systematic review and meta-analysis. *BMJ*, 342, d671.
- SAMOKHVALOV, A. V., IRVING, H., MOHAPATRA, S. & REHM, J. 2010. Alcohol consumption, unprovoked seizures, and epilepsy: a systematic review and meta-analysis. *Epilepsia*, 51, 1177-84.
- TAYLOR, B., IRVING, H. M., BALIUNAS, D., ROERECKE, M., PATRA, J., MOHAPATRA, S. & REHM, J. 2009. Alcohol and hypertension: gender differences in dose-response relationships determined through systematic review and meta-analysis. *Addiction*, 104, 1981-90.
- WCRF / AICR 2007. World Cancer Research Fund and American Institute for Cancer Research. Food, nutrition, physical activity, and the prevention of cancer: a global perspective. Washington DC: AICR.
